# Supplementary material for: The Effects of Mental Health Parity on Spending and Utilization for Bipolar, Major Depression, and Adjustment Disorders
Source: Atypon-hosted journal article supplement (doi:10.1176/appi.ajp.2012.12030392), 2013-02-01
Supplement: 180_ds001.pdf [file 180_ds001.pdf]

TABLE S1. Regression results (Poisson and logistic) of annual spending and service utilization outcomes for FEHBP enrollees diagnosed with bipolar disorder, major depression and adjustment disorder post-parity implementation, compared to pre-parity (2000).

| <b>Change in annual spending and utilization</b> |                 |             |                 |             |
|--------------------------------------------------|-----------------|-------------|-----------------|-------------|
| <b>Bipolar Disorder</b>                          |                 |             |                 |             |
|                                                  | <b>2001</b>     |             | <b>2002</b>     |             |
| <b>MHSA Spending</b>                             | <b>Estimate</b> | <b>S.E.</b> | <b>Estimate</b> | <b>S.E.</b> |
| Probability of any spending                      | 0.0105          | 0.0659      | -0.0080         | 0.0659      |
| Conditional on use:                              |                 |             |                 |             |
| Total spending                                   | -0.0562         | 0.0340      | -0.0459         | 0.0421      |
| Out-of-pocket spending                           | -0.2164         | 0.0329      | -0.1684         | 0.0383      |
| <b>MHSA service utilization</b>                  | <b>Estimate</b> | <b>S.E.</b> | <b>Estimate</b> | <b>S.E.</b> |
| Psychotherapy                                    | -0.0104         | 0.0408      | -0.1178         | 0.0522      |
| Medication Management                            | -0.0565         | 0.0494      | 0.0437          | 0.0604      |
| Prescriptions                                    | -0.0336         | 0.0220      | -0.0169         | 0.0244      |
| Inpatient MHSA (bed days)                        | 0.0002          | 0.2385      | 0.2519          | 0.2452      |
| <b>Major Depression</b>                          |                 |             |                 |             |
| <b>MHSA Spending</b>                             | <b>Estimate</b> | <b>S.E.</b> | <b>Estimate</b> | <b>S.E.</b> |
| Probability of any spending                      | -0.0000         | 0.0251      | -0.0005         | 0.0272      |
| Conditional on use:                              |                 |             |                 |             |
| Total spending                                   | -0.0490         | 0.0183      | -0.0418         | 0.0225      |
| Out-of-pocket spending                           | -0.2240         | 0.0187      | -0.2047         | 0.0222      |
| <b>MHSA service utilization</b>                  | <b>Estimate</b> | <b>S.E.</b> | <b>Estimate</b> | <b>S.E.</b> |
| Psychotherapy                                    | 0.0277          | 0.0203      | -0.0617         | 0.0276      |
| Medication Management                            | -0.0671         | 0.0280      | -0.0179         | 0.0335      |
| Prescriptions                                    | -0.0071         | 0.0120      | -0.0069         | 0.0140      |
| Inpatient MHSA (bed days)                        | 0.1018          | 0.2050      | 0.2366          | 0.2473      |
| <b>Adjustment Disorder</b>                       |                 |             |                 |             |
| <b>MHSA Spending</b>                             | <b>Estimate</b> | <b>S.E.</b> | <b>Estimate</b> | <b>S.E.</b> |
| Probability of any spending                      | 0.0483          | 0.0255      | 0.0228          | 0.0282      |
| Conditional on use:                              |                 |             |                 |             |
| Total spending                                   | -0.0481         | 0.0364      | -0.1199         | 0.0431      |
| Out-of-pocket spending                           | -0.1861         | 0.0372      | -0.2263         | 0.0429      |
| <b>MHSA service utilization</b>                  | <b>Estimate</b> | <b>S.E.</b> | <b>Estimate</b> | <b>S.E.</b> |
| Psychotherapy                                    | -0.0322         | 0.0327      | -0.1837         | 0.0443      |
| Medication Management                            | 0.0500          | 0.0971      | 0.1128          | 0.1282      |
| Prescriptions                                    | 0.0250          | 0.0289      | 0.0248          | 0.0320      |
| Inpatient MHSA (bed days)                        | 0.2193          | 0.4877      | 0.6250          | 0.5837      |
